# Supplementary material
Source: HighWire-hosted journal article supplement (https://gh.bmj.com/content/4/6/e001839)

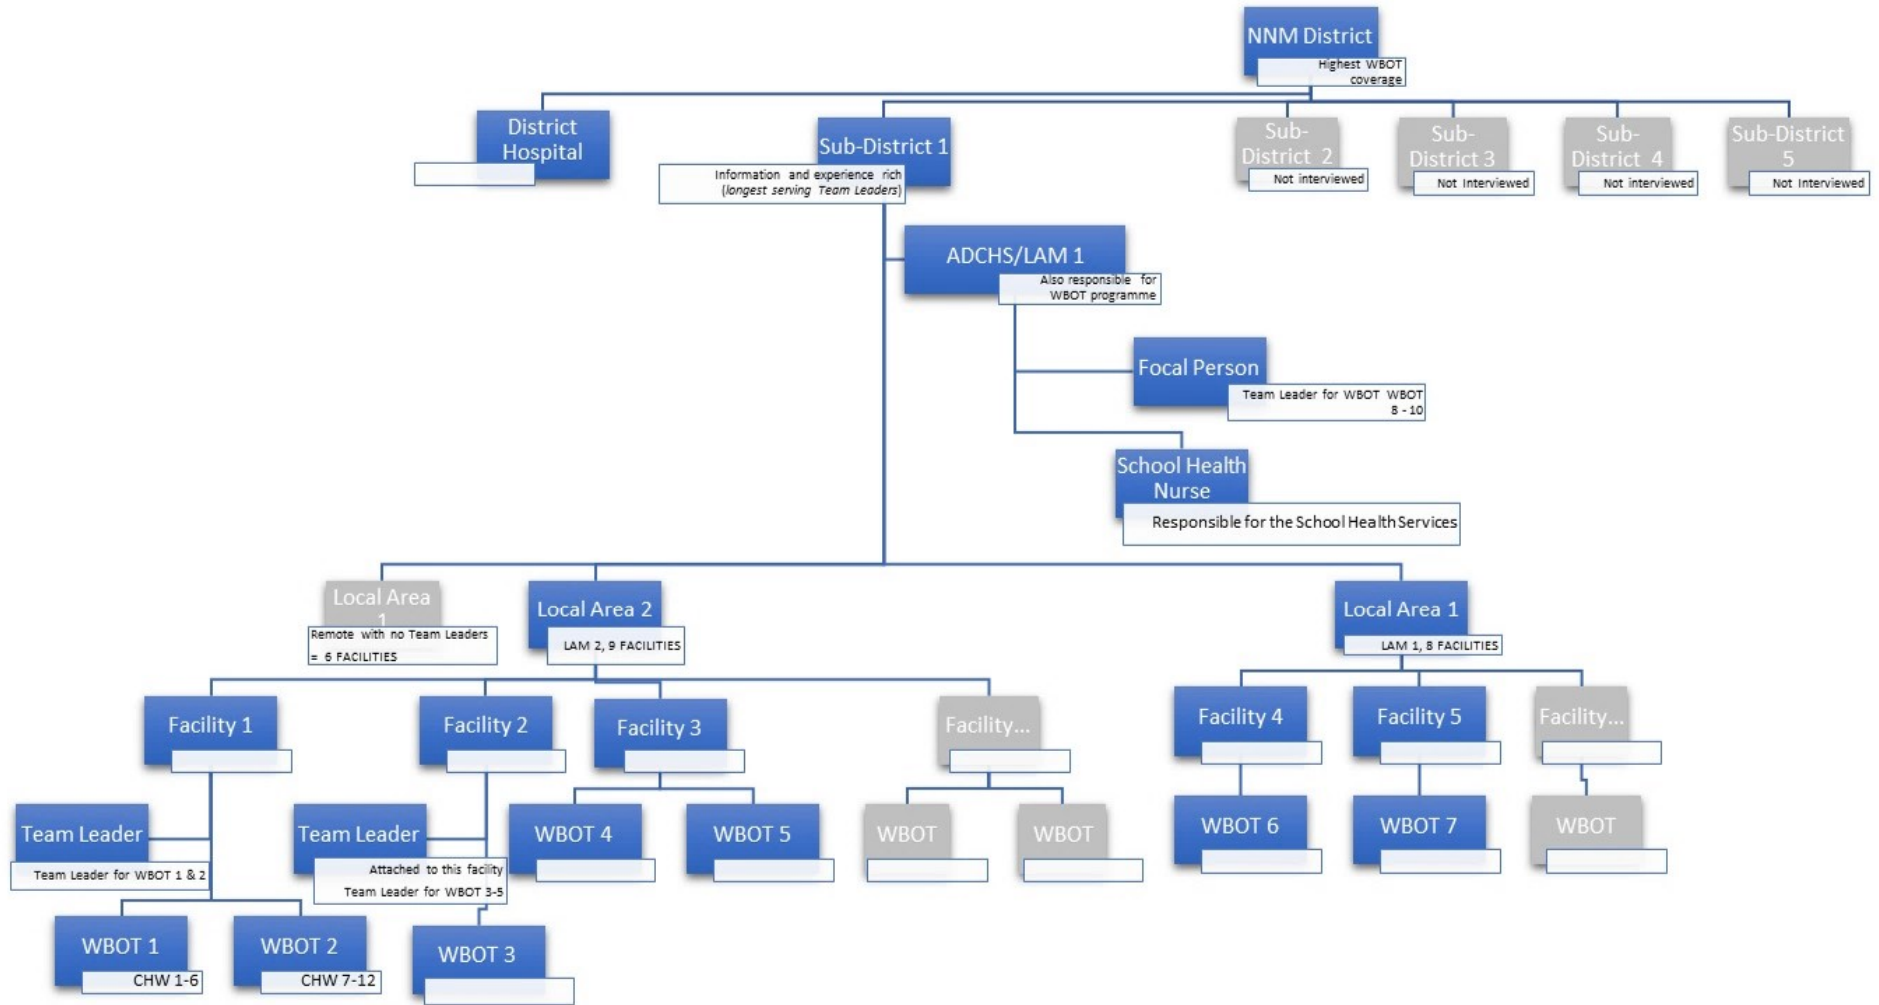

Supplement: inline-supplementary-material-1 [file inline-supplementary-material-1.pdf]
